# Supplementary material for: Genetically Corrected iPSC-Derived Neural Stem Cell Grafts Deliver Enzyme Replacement to Affect CNS Disease in Sanfilippo B Mice
Source: PubMed Central journal article supplement (PMC6076361; doi:10.1016/j.omtm.2018.06.005), 2018-07-23

**OMTM, Volume 10**

**Supplemental Information**

**Genetically Corrected iPSC-Derived Neural  
Stem Cell Grafts Deliver Enzyme Replacement  
to Affect CNS Disease in Sanfilippo B Mice**

**Don Clarke, Yewande Pearse, Shih-hsin Kan, Steven Q. Le, Valentina Sanghez, Jonathan D. Cooper, Patricia I. Dickson, and Michelina Iacovino**

**Supplementary Figure 1. Biological Effect of NAGLU Treatment *in Vitro***

*Naglu*<sup>-/-</sup> Neural Stem Cells (NSC) (A, B) or differentiated (C, D) cells treated for ten days with supernatant collected from *Naglu* overexpressing NSC (*N*-iNSCs) were compared to *Naglu*<sup>+/+</sup> untreated cells. (A) Nestin+ iNSCs, forward and side scatter (top) and LysoTracker staining (bottom). (B) FACS quantification: frequency of cell having bright LysoTracker signal (top) and mean LysoTracker signal (bottom). (C) Nestin-differentiated iNSCs, forward and side scatter (top) and LysoTracker staining (bottom). (D) FACS quantification: frequency cell having bright LysoTracker signal (top) and mean LysoTracker signal (bottom). Two-tailed *t*-test *p*-values . \**p* < 0.05, \*\**p* < 0.01, *n* = 3.

**Supplementary Figure 2. Correction of Astrocytosis in *Naglu*<sup>-/-</sup> Mice Treated with Neural Stem Cells Overexpressing NAGLU (*N*-iNSCs) at Two Months**

(A) Schematic illustration intracerebroventricular (ICV, green) at bregma 1.54 mm; intraparenchymal (PAR, blue) at bregma -0.58 mm demonstrating regions of analysis (red squares), relative to the site of engraftment (ICV and PAR), including the motor cortex, striatum and ventral forebrain. (B) Representative bright-field images of half brain coronal sections of immunohistochemical staining of GFAP after *N*-iNSCs transplantation (-/- Treated) compared to unaffected heterozygous (Unaffected) and saline-injected controls (-/- Vehicle), scale bar = 1 mm. (C1-3) Representative immunohistological staining images for GFAP in higher magnification in the motor cortex (1), striatum (2) and ventral forebrain (3). Scale bar = 100 μm. Insert images taken

at higher magnification to highlight differences in morphology of GFAP-stained astrocytes, scale bar = 20  $\mu\text{m}$ . Post-acquisition processing was applied to all images and included adjustments to brightness/contrast and Red Green Blue (RGB) curves using Adobe Photoshop CS6, to reduce improve visibility and consistency in colour tone. Area of GFAP immunoreactivity ( $\mu\text{M}^2$ ) is summarized in the histograms. Values are shown as mean  $\pm$  SEM (n = 3 mice per group), for p-values, see Table 1 and 2. \*p < 0.05, \*\*p < 0.01, \*\*\*p < 0.001.

***Supplementary Figure 3. Correction of Storage Material Accumulation in *Naglu*<sup>-/-</sup> mice Treated with Neural Stem Cells Overexpressing NAGLU (N-iNSCs) at Two Months***

(A) Schematic illustration intracerebroventricular (ICV, green) at bregma 1.54 mm; intraparenchymal (PAR, blue) at bregma -0.58 mm demonstrating regions of analysis (red squares), relative to the site of engraftment (ICV and PAR), including the motor cortex, striatum and ventral forebrain. (B) Representative bright-field images of half coronal sections immunostained for Lamp 1 in *Naglu*<sup>-/-</sup> mice (-/- Vehicle), heterozygotes (Unaffected) and N-iNSC transplanted (-/- Treated) mice. Scale bar = 1 mm. (C1-3) Representative bright-field images of the motor cortex (1), striatum (2) and ventral forebrain (3). Scale bar = 100  $\mu\text{m}$ . Insert images taken at higher magnification to highlight cells with larger Lamp 1 staining lysosomes, scale bar = 20  $\mu\text{m}$ . Post-acquisition processing was applied to all images and included adjustments to brightness/contrast and Red Green Blue (RGB) curves using Adobe Photoshop CS6, to reduce improve visibility and consistency in colour tone. Area of Lamp1 immunoreactivity ( $\mu\text{M}^2$ ) is summarized in

the histograms showing differences between each treatment group. Values are shown as mean  $\pm$  SEM (n = 3 mice per group) for p-values, see Table 1 and 2. \*p < 0.05.

**A****Nestin+ iNSCs**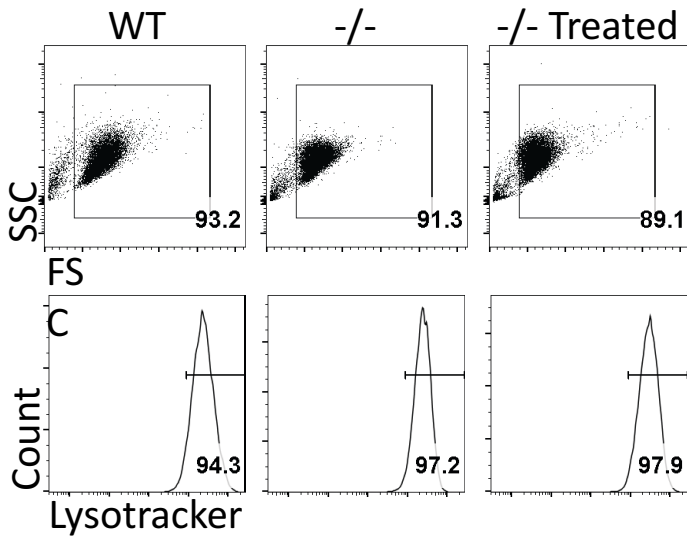**B**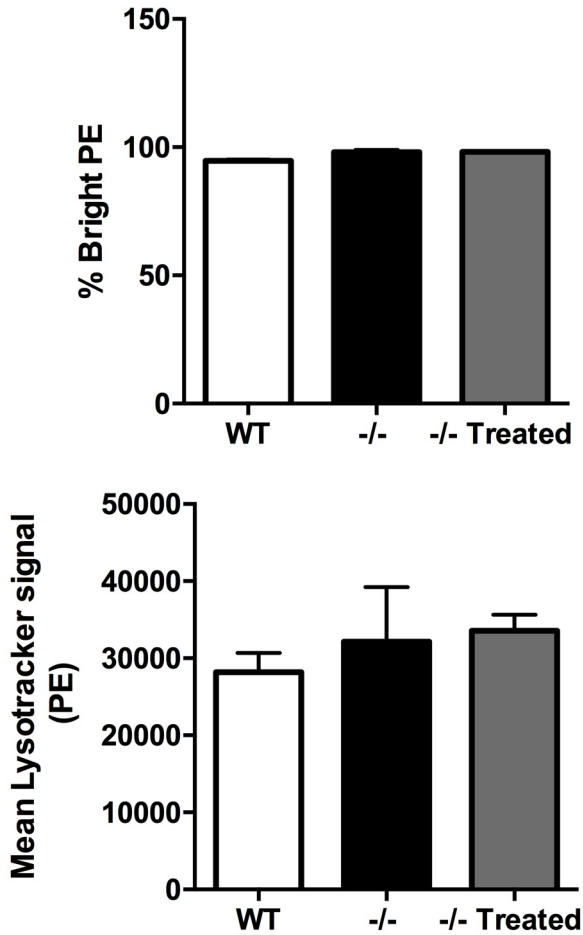**C****Nestin- Differentiated iNSCs**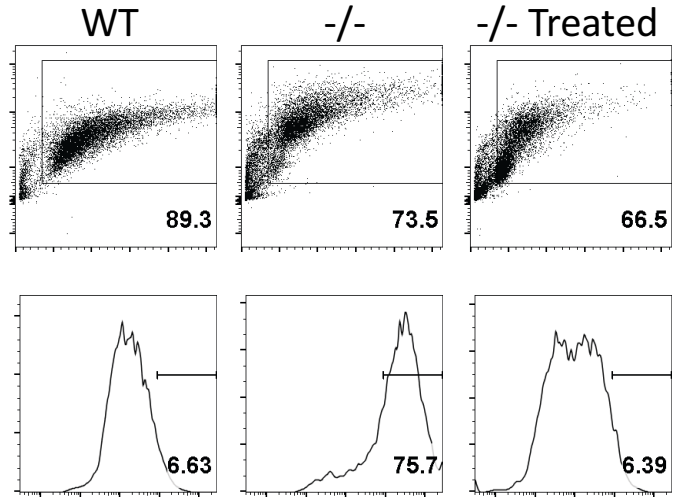**D**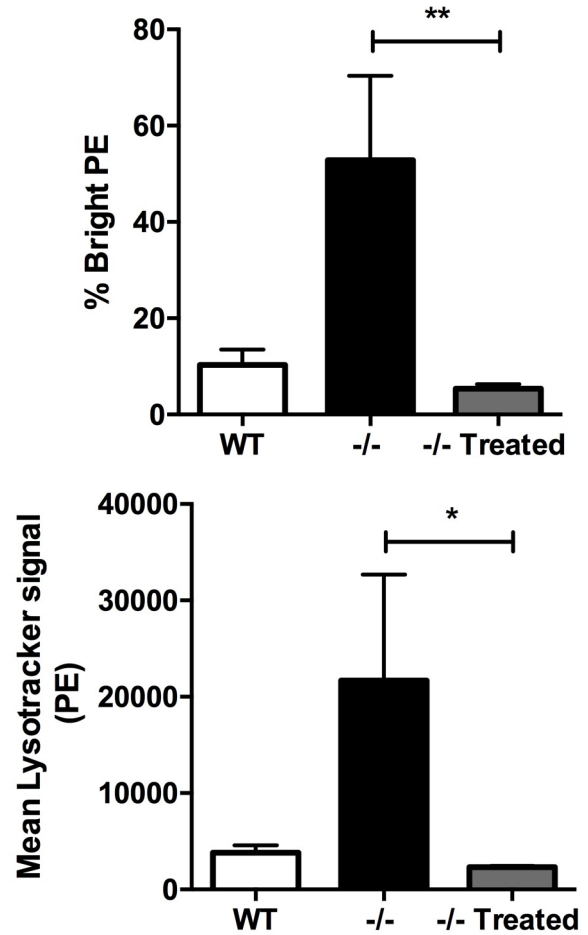

**A**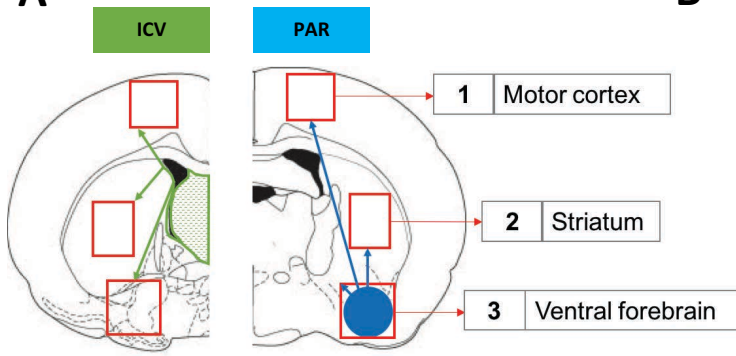**B**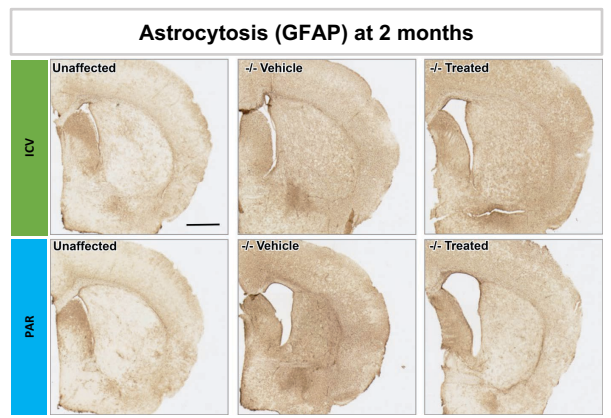**C**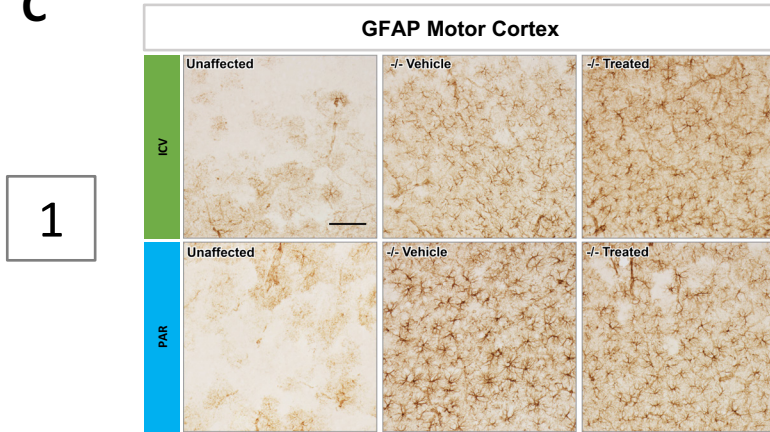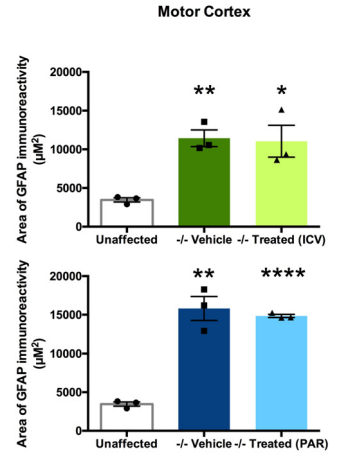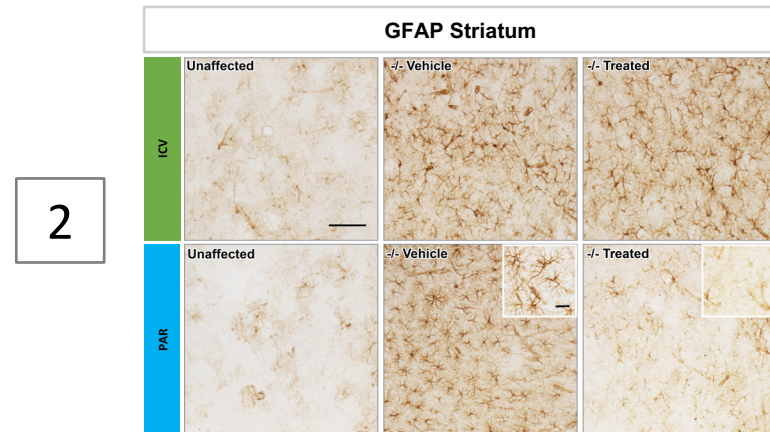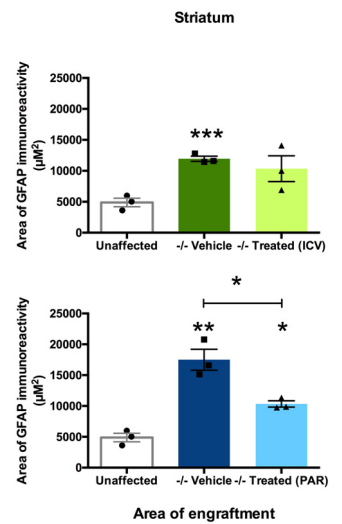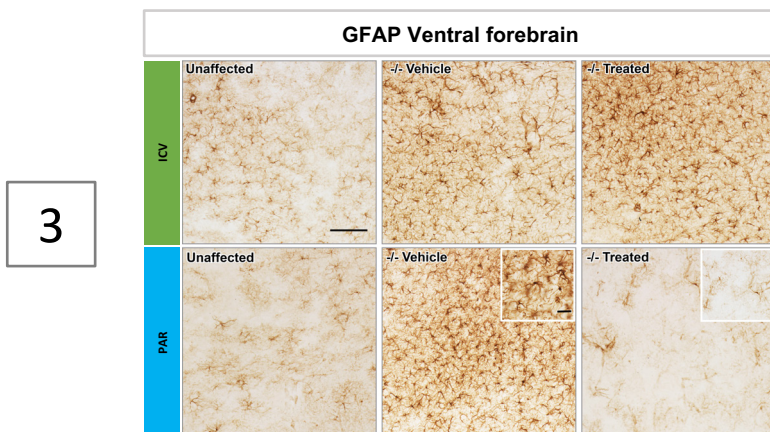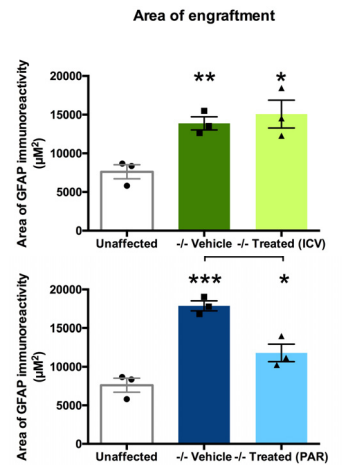

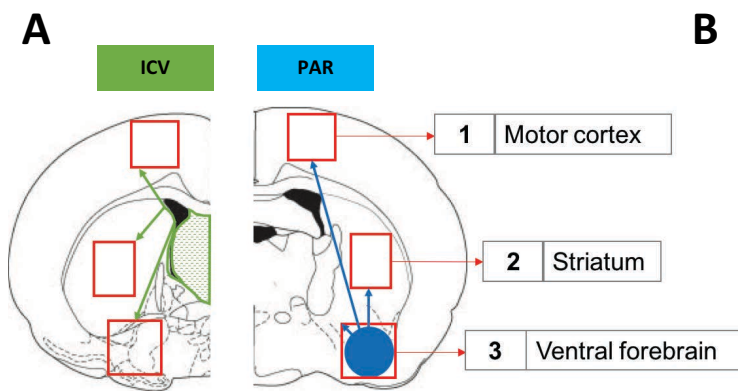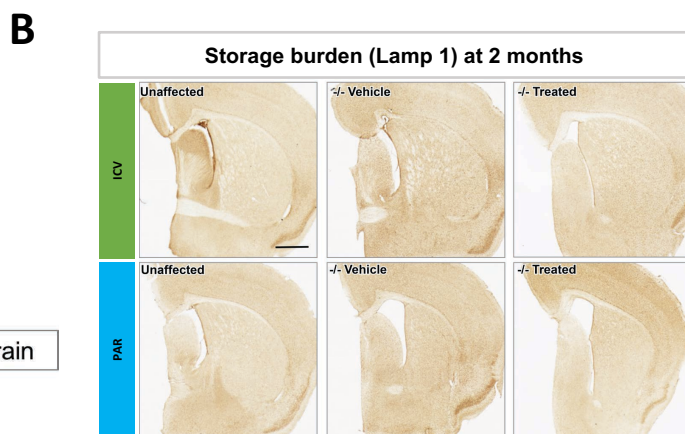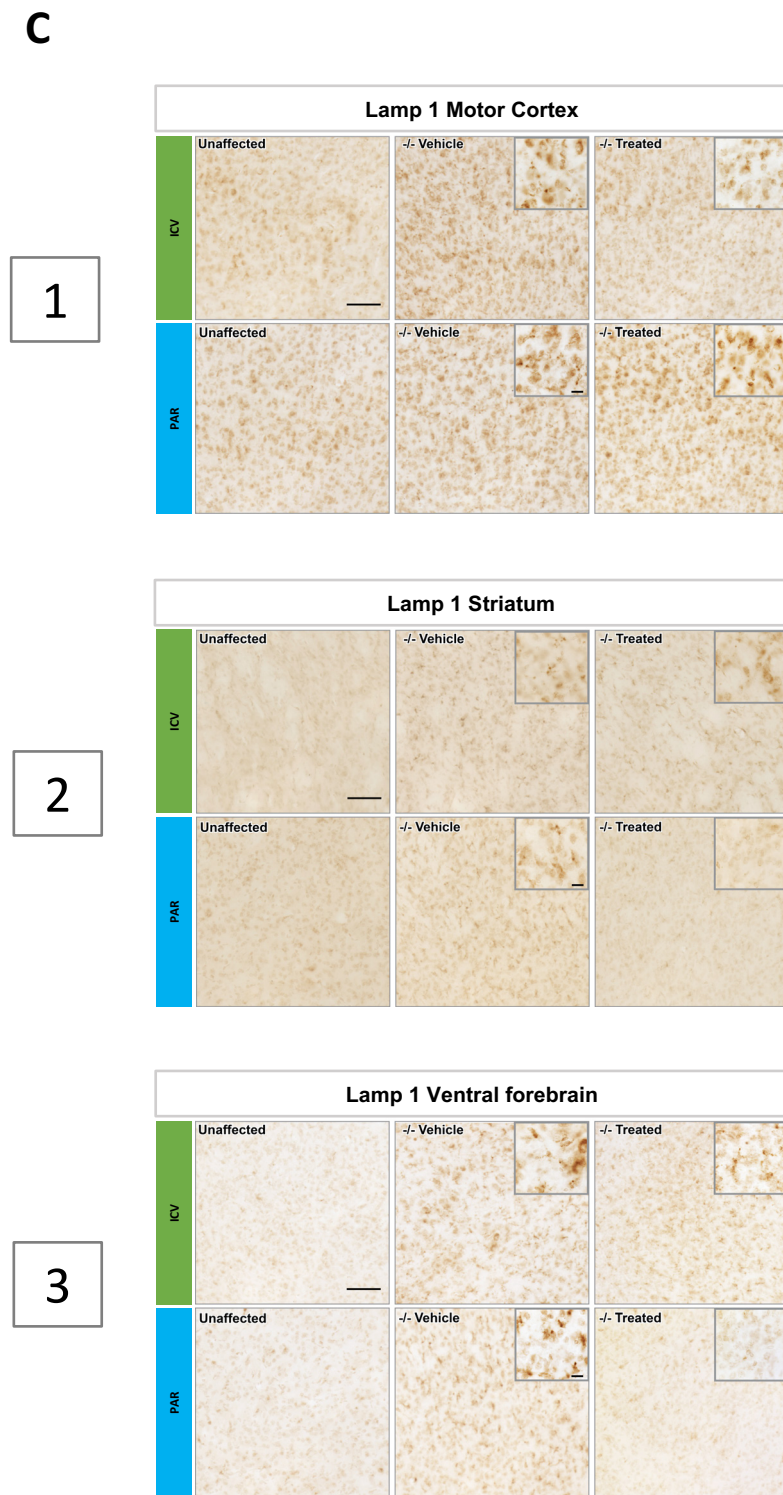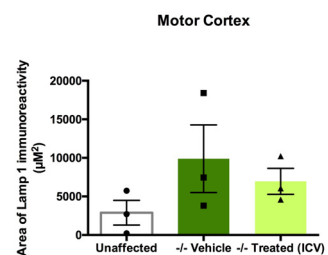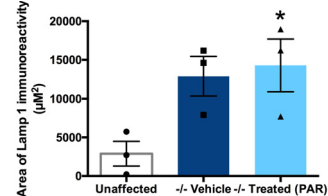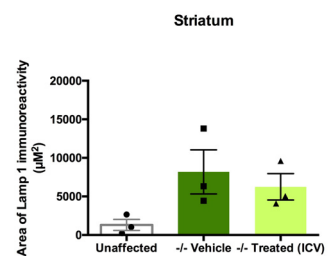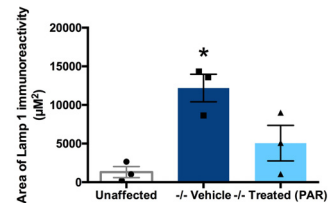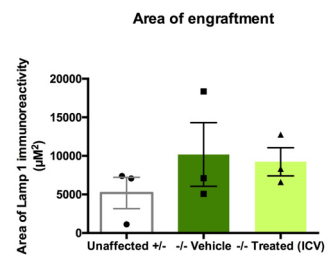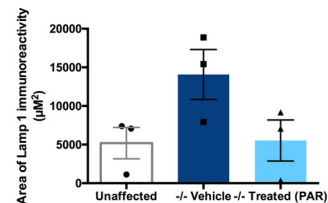

Supplement: mmc1.pdf [file mmc1.pdf]
